# Supplementary material
Source: PubMed Central journal article supplement (PMC4163019)

Supplementary Material for: Toward a new history and geography  
of human genes informed by ancient DNA

Joseph K. Pickrell<sup>1,2</sup>, David Reich<sup>3,4,5</sup>

<sup>1</sup> New York Genome Center, New York, NY

<sup>2</sup> Department of Biological Sciences, Columbia University, New York, NY

<sup>3</sup> Department of Genetics, Harvard Medical School, Boston, MA

<sup>4</sup> Howard Hughes Medical Institute, Harvard Medical School, Boston, MA

<sup>5</sup> Broad Institute of MIT and Harvard, Cambridge, MA

June 9, 2014

# 1 Simulations of smooth linear declines in heterozygosity under admixture models.

In this section, we detail the models presented in Figure 1B and 1C.

## 1.1 Approximation of heterozygosity under admixture models

Consider an admixed population  $A$  that has admixture proportions  $\alpha$  and  $1 - \alpha$  from two ancestral populations:  $Y$  and  $Z$ , respectively. The heterozygosity in  $A$  is the expected number of differences between two random haplotypes sampled from the population. To approximate this, we let the time of admixture be the present (in the models later on, we have admixture at 60 generations in the past and 800 generations in the past, so in some cases this will be a poor approximation). With this simplification:

$$H_A \approx \alpha^2 H_Y + 2\alpha(1 - \alpha)H_x^{YZ} + (1 - \alpha)^2 H_Z, \quad (1)$$

where  $H_Y$  is the heterozygosity in population  $Y$ ,  $H_Z$  is the corresponding quantity for population  $Z$ , and  $H_x^{YZ}$  is the heterozygosity when sampling a single haplotype from population  $Y$  and a single haplotype from population  $Z$ . Rearranging this gives:

$$\alpha^2(H_Y - 2H_x^{YZ} + H_Z) + \alpha(2H_x^{YZ} - 2H_Z) + H_Z - H_A = 0. \quad (2)$$

Solving this for  $\alpha$  gives the admixture proportion necessary to produce a given  $H_A$ .

## 1.2 Model with severe bottlenecks and recent admixture

In the demographic model in Figure 1B in the main text (reproduced in the upper panel of Supplementary Figure 1), all 42 simulated populations are a mixture between three ancestral populations. We set the ancestral effective population size to 10,000 individuals and the mutation rate to  $\mu = 2.5 \times 10^{-8}$ . To apply Equation 2, we need the heterozygosity in populations 1-3 ( $H_1$ ,  $H_2$ , and  $H_3$ , labeled from left to right in Supplementary Figure 1), and the relevant cross-population heterozygosities ( $H_x^{12}$ ,  $H_x^{23}$ ) (in Supplementary Figure 1 there are no populations with ancestry from both populations 1 and 3).  $H_1$  is 0.001. The extreme bottlenecks consist of a reduction in population size to 25 individuals for 10 generations, so  $H_2$  is approximately  $(1 - 0.02)^{10} H_1 = 0.00081$ , and  $H_3$  is approximately  $(1 - 0.02)^{20} H_1 = 0.00067$ . The cross-population heterozygosities are  $H_x^{12} = 0.001 + 4400\mu$  and  $H_x^{23} = 0.00081 + 2200\mu$ . We applied Equation 2 to get a set of 42 populations with an approximately linear decline in heterozygosity; these admixture proportions are shown in the lower panel of Supplementary Figure 1.

## 1.3 Model with no bottlenecks and ancient admixture

In the demographic model in Figure 1C in the main text (reproduced in the upper panel of Supplementary Figure 2), all simulated populations are again a mixture between three ancestral pop-

ulations. In this case, however, the first two populations experienced admixture with an archaic population 800 generations in the past, with admixture proportions  $\beta_1$  and  $\beta_2$ , respectively (these are 20% and 9% in the simulations). We again set the effective population size to 10,000 individuals and the mutation rate to  $\mu = 2.5 \times 10^{-8}$ . Again, we need the expected heterozygosities in populations 1-3 ( $H_1$ ,  $H_2$ , and  $H_3$ , labeled from left to right in Supplementary Figure 2), and the relevant expected cross-population heterozygosities ( $H_x^{12}$ ,  $H_x^{23}$ ). With the approximation that the archaic admixture occurred in the present:

$$H_1 = \beta_1^2 0.001 + 2\beta_1(1 - \beta_1)[0.001 + 32000\mu] + (1 - \beta_1)^2 0.001 \quad (3)$$

$$H_2 = \beta_2^2 0.001 + 2\beta_2(1 - \beta_2)[0.001 + 32000\mu] + (1 - \beta_2)^2 0.001 \quad (4)$$

$$H_3 = 0.001 \quad (5)$$

$$H_x^{12} = \beta_1\beta_2 0.001 + \beta_1(1 - \beta_2)[0.001 + 32000\mu] + (1 - \beta_1)\beta_2[0.001 + 4400\mu] + (1 - \beta_1)(1 - \beta_2)0.001 \quad (6)$$

$$H_x^{23} = \beta_2[0.001 + 32000\mu] + (1 - \beta_2)[0.001 + 2200\mu] \quad (7)$$

We used these approximations and Equation 2 to get a set of 42 populations with an approximately linear decline in heterozygosity; these admixture proportions are shown in the lower panel of Supplementary Figure 2.

#### 1.4 Simulation parameters

To generate Figure 1, we performed simulations of different demographic parameters using `ms` (Hudson, 2002). For the serial bottleneck model in Figure 1A, following a demographic model similar to DeGiorgio et al., 2009, we used the following command to generate 20 haplotypes from each of 42 populations:

```
ms 840 1 -t 100 -r 10 100000 -I 42 20 20 20 20 20 20 20 20 20 20 20 20 20 20 20 20 20 20 20 20 20 20 20 20 20 20 20 20 20 -en
0.00114146341463 42 0.025 -ej 0.00134146341463 42 41 -en 0.00248292682927 41 0.025
-ej 0.00268292682927 41 40 -en 0.0038243902439 40 0.025 -ej 0.0040243902439 40 39 -en
0.00516585365854 39 0.025 -ej 0.00536585365854 39 38 -en 0.00650731707317 38 0.025
-ej 0.00670731707317 38 37 -en 0.0078487804878 37 0.025 -ej 0.0080487804878 37 36 -en
0.00919024390244 36 0.025 -ej 0.00939024390244 36 35 -en 0.0105317073171 35 0.025 -ej
0.0107317073171 35 34 -en 0.0118731707317 34 0.025 -ej 0.0120731707317 34 33 -en 0.0132146341463
33 0.025 -ej 0.0134146341463 33 32 -en 0.014556097561 32 0.025 -ej 0.014756097561 32
31 -en 0.0158975609756 31 0.025 -ej 0.0160975609756 31 30 -en 0.0172390243902 30 0.025
-ej 0.0174390243902 30 29 -en 0.0185804878049 29 0.025 -ej 0.0187804878049 29 28 -en
0.0199219512195 28 0.025 -ej 0.0201219512195 28 27 -en 0.0212634146341 27 0.025 -ej
0.0214634146341 27 26 -en 0.0226048780488 26 0.025 -ej 0.0228048780488 26 25 -en 0.023946341463
25 0.025 -ej 0.0241463414634 25 24 -en 0.025287804878 24 0.025 -ej 0.025487804878 24
23 -en 0.0266292682927 23 0.025 -ej 0.0268292682927 23 22 -en 0.0279707317073 22 0.025
-ej 0.0281707317073 22 21 -en 0.029312195122 21 0.025 -ej 0.029512195122 21 20 -en
0.0306536585366 20 0.025 -ej 0.0308536585366 20 19 -en 0.0319951219512 19 0.025 -ej
```





et al. [2], for each population in each simulation, we identified all SNPs separated by a distance of 10-11kb and calculated the average  $r^2$  between these SNPs. We then averaged this across all simulations separately for each population. These averages are shown In Supplementary Figure 3. In all three scenarios, we recapitulate the qualitative pattern of an increase in LD with distance from a reference population. Note that this implies that archaic admixture *decreases* levels of LD (Supplementary Figure 3F), which seems counterintuitive. However, this is simply a consequence of a shift in the allele frequency spectrum to lower frequency SNPs in populations with archaic admixture (DeGiorgio et al. [2] see the same effect of a decrease in LD with archaic admixture in their simulations, which they attribute to an interaction between population bottlenecks and archaic admixture. However, the demographic model in Supplementary Figure 3C has no bottlenecks, so this cannot be the case in our simulations).

## 2 Admixture tests

To generate Figure 2, we combined SNP data generated on Illumina chips from a number of sources (Li et al., 2008; Altshuler et al., 2010; Behar et al., 2010; Henn et al., 2011; Schlebusch et al., 2012). We excluded the Jewish populations from Behar et al. 2010. In total, the data set consisted of 103 populations and 256,540 SNPs (Supplementary Table 1).

We used admixtools (Patterson et al., 2012) to compute all possible  $f_3$  statistics of the form  $f_3(A; B, C)$  on these populations. We considered an  $f_3$  statistic to be significant evidence for admixture in population A if it was at least three standard errors less than zero (corresponding to a P-value of about 0.001). In Supplementary Table 1, we list all populations, their approximate latitudes and longitudes, and the representatives of the admixing populations (if any). These representatives were chosen as the population pair B and C that give the minimum  $f_3$  statistic.

**Table 1: Populations tested for admixture.** For each population, we show the name of the publication from which we received the data, the name of the population according to the publication from which the data was obtained, the country of the population, the region we into which we classified the population, the approximate latitude and longitude of the population, and the names of the two source populations that give the most negative  $f_3$  statistics. This latter information is only shown for populations with at least one significantly negative  $f_3$  statistic.

| Pub. | Population         | Country        | Region     | Lat    | Long | Source 1      | Source 2    |
|------|--------------------|----------------|------------|--------|------|---------------|-------------|
| [6]  | AFAR               | Ethiopia       | EASTAF     | 12     | 41   | Sardinian     | SUDANESE    |
| [6]  | AMHARA             | Ethiopia       | EASTAF     | 10     | 39   | Sardinian     | SUDANESE    |
| [6]  | ANUAK              | Ethiopia       | EASTAF     | 8      | 34   | ARIBLACKSMITH | SUDANESE    |
| [6]  | ARIBLACKSMITH      | Ethiopia       | EASTAF     | 5      | 36   |               |             |
| [6]  | ARICULTIVATOR      | Ethiopia       | EASTAF     | 3      | 40   | Juhoansi      | Sardinian   |
| [6]  | ESOMALI            | Ethiopia       | EASTAF     | 9      | 42   | Sardinian     | SUDANESE    |
| [6]  | GUMUZ              | Ethiopia       | EASTAF     | 10.8   | 35.6 |               |             |
| [6]  | OROMO              | Ethiopia       | EASTAF     | 8      | 37   | Sardinian     | SUDANESE    |
| [6]  | SOMALI             | Ethiopia       | EASTAF     | 5.2    | 46.2 | Sardinian     | SUDANESE    |
| [6]  | SUDANESE           | Sudan          | EASTAF     | 12.9   | 30.2 |               |             |
| [6]  | TYGRAY             | Ethiopia       | EASTAF     | 13     | 38   | Sardinian     | SUDANESE    |
| [6]  | WOLAYTA            | Ethiopia       | EASTAF     | 6      | 39   | MbutiPygmy    | Sardinian   |
| [7]  | Khwe               | Angola         | SAF        | -17.4  | 23.0 | Mozabite      | Juhoansi    |
| [7]  | Xun                | Angola         | SAF        | -14.7  | 17.7 | Yoruba        | Juhoansi    |
| [7]  | GuiGana            | Botswana       | SAF        | -23.7  | 24.7 | Yoruba        | Juhoansi    |
| [7]  | Juhoansi           | Namibia        | SAF        | -19.6  | 20.5 |               |             |
| [7]  | Nama               | Namibia        | SAF        | -22.6  | 17.1 | Basque        | Juhoansi    |
| [7]  | Karretjie          | SouthAfrica    | SAF        | -30.8  | 25.1 | Russian       | Juhoansi    |
| [7]  | ColouredWellington | SouthAfrica    | SAF        | -33.7  | 19.0 | Russian       | Juhoansi    |
| [3]  | HADZA              | Tanzania       | EASTAF     | -3.4   | 33.7 |               |             |
| [3]  | SANDAWÉ            | Tanzania       | EASTAF     | -6.2   | 35.7 | Juhoansi      | Sardinian   |
| [3]  | Khomani            | SouthAfrica    | SAF        | -27.0  | 20.8 | Belorussians  | Juhoansi    |
| [4]  | LWK                | Kenya          | EASTAF     | 0.618  | 34.8 | BiakaPygmy    | Sardinian   |
| [4]  | YRI                | Nigeria        | WAF        | 8      | 5    |               |             |
| [4]  | MKK                | Kenya          | EASTAF     | -0.321 | 37.8 | MbutiPygmy    | Sardinian   |
| [4]  | GIH                | India          | CSASIA     | 27     | 72   | Paniya        | Georgians   |
| [4]  | CEU                | CEPH           | NEUROPE    | 55     | -3   | Karitiana     | Sardinian   |
| [4]  | TSI                | Italy          | SEUROPE    | 43     | 11   | Karitiana     | Sardinian   |
| [4]  | CHB                | China          | EASTASIA   | 32.500 | 114  | Dai           | Daur        |
| [4]  | JPT                | Japan          | NEASTASIA  | 38     | 138  |               |             |
| [5]  | Mozabite           | Algeria-Mzab   | MIDDLEEAST | 32     | 3    | YRI           | Sardinian   |
| [5]  | Druze              | Israel-Carmel  | MIDDLEEAST | 32     | 35   |               |             |
| [5]  | Palestinian        | Israel-Central | MIDDLEEAST | 32     | 37   | Yoruba        | Sardinian   |
| [5]  | Bedouin            | Israel-Negev   | MIDDLEEAST | 29     | 35   | Sardinian     | SUDANESE    |
| [5]  | Sindhi             | Pakistan       | CSASIA     | 25.5   | 69   | Paniya        | Georgians   |
| [5]  | Uygur              | China          | CSASIA     | 44     | 81   | Italian       | Japanese    |
| [5]  | Yoruba             | Nigeria        | WAF        | 8      | 5    |               |             |
| [5]  | Mandenka           | Senegal        | WAF        | 12     | -12  |               |             |
| [5]  | BantuKenya         | Kenya          | EASTAF     | -3     | 37   | BiakaPygmy    | Samaritians |
| [5]  | BantuSouthAfrica   | SouthAfrica    | SAF        | -23    | 20.7 | YRI           | Juhoansi    |

|     |              |                 |            |        |         |             |                  |
|-----|--------------|-----------------|------------|--------|---------|-------------|------------------|
| [5] | Xibo         | China           | CSASIA     | 43.5   | 83.5    | Lithuanians | Japanese         |
| [5] | Balochi      | Pakistan        | CSASIA     | 30.5   | 69.5    | Cypriots    | Paniya           |
| [5] | BiakaPygmy   | CAR             | CAF        | 4      | 17      |             |                  |
| [5] | MbutiPygmy   | Congo           | CAF        | 1      | 29      |             |                  |
| [5] | Brahui       | Pakistan        | CSASIA     | 30.5   | 66.5    | Cypriots    | Paniya           |
| [5] | Burusho      | Pakistan        | CSASIA     | 36.5   | 74      | Georgians   | Naxi             |
| [5] | Hazara       | Pakistan        | CSASIA     | 33.5   | 73      | Italian     | Japanese         |
| [5] | Kalash       | Pakistan        | CSASIA     | 36     | 71.5    |             |                  |
| [5] | Makrani      | Pakistan        | CSASIA     | 26     | 64      | Legzins     | BantuSouthAfrica |
| [5] | Pathan       | Pakistan        | CSASIA     | 33.5   | 70.5    | Samaritians | Karitiana        |
| [5] | French       | France          | NEUROPE    | 46     | 2       | Karitiana   | Sardinian        |
| [5] | Basque       | France          | SEUROPE    | 43     | 0       |             |                  |
| [5] | Italian      | Italy           | SEUROPE    | 46     | 10      | Karitiana   | Sardinian        |
| [5] | Sardinian    | Italy           | SEUROPE    | 40     | 9       |             |                  |
| [5] | Orcadian     | Orkney          | NEUROPE    | 59     | -3      | Karitiana   | Sardinian        |
| [5] | Russian      | Russia          | NEUROPE    | 61     | 40      | Karitiana   | Sardinian        |
| [5] | Adygei       | Russia-Caucasus | NEUROPE    | 44     | 39      | Karitiana   | Sardinian        |
| [5] | Cambodian    | Cambodia        | EASTASIA   | 12     | 105     | Dai         | Samaritians      |
| [5] | Dai          | China           | EASTASIA   | 21     | 100     |             |                  |
| [5] | Daur         | China           | NEASTASIA  | 46.500 | 124     | Han         | Yakut            |
| [5] | Han          | China           | EASTASIA   | 32.500 | 114     | Dai         | Daur             |
| [5] | Hezhen       | China           | NEASTASIA  | 47.500 | 136.5   | She         | Yakut            |
| [5] | Lahu         | China           | EASTASIA   | 22     | 102     |             |                  |
| [5] | Miaozu       | China           | EASTASIA   | 27     | 109     |             |                  |
| [5] | Mongola      | China           | NEASTASIA  | 48.5   | 119     | Lithuanians | Japanese         |
| [5] | Naxi         | China           | EASTASIA   | 26     | 100     |             |                  |
| [5] | Oroqen       | China           | NEASTASIA  | 50.5   | 126.500 | Han         | Yakut            |
| [5] | She          | China           | EASTASIA   | 27     | 119     |             |                  |
| [5] | Tu           | China           | EASTASIA   | 36     | 101     | CEU         | Tujia            |
| [5] | Tujia        | China           | EASTASIA   | 29     | 109     | Dai         | Hezhen           |
| [5] | Yizu         | China           | EASTASIA   | 28     | 103     |             |                  |
| [5] | Japanese     | Japan           | EASTASIA   | 38     | 138     |             |                  |
| [5] | Yakut        | Siberia         | NEASTASIA  | 70     | 129.500 |             |                  |
| [5] | Melanesian   | Bougainville    | OCEANIA    | -6     | 155     |             |                  |
| [5] | Papuan       | NewGuinea       | OCEANIA    | -4     | 143     |             |                  |
| [5] | Karitiana    | Brazil          | AMERICA    | -10    | -63     |             |                  |
| [5] | Surui        | Brazil          | AMERICA    | -11    | -62     |             |                  |
| [5] | Colombian    | Colombia        | AMERICA    | 3      | -68     |             |                  |
| [5] | Maya         | Mexico          | AMERICA    | 19     | -91     | Moroccans   | Surui            |
| [5] | Pima         | Mexico          | AMERICA    | 29     | -108    |             |                  |
| [1] | Armenians    | Armenia         | CAUCASUS   | 40.1   | 45.0    | GIH         | Sardinian        |
| [1] | Belorussians | Belarus         | NEUROPE    | 53.7   | 28.0    | Karitiana   | Sardinian        |
| [1] | Chuvaths     | Russia          | NEUROPE    | 55.6   | 46.930  | Oroqen      | Lithuanians      |
| [1] | Cypriots     | Cyprus          | SEUROPE    | 35.1   | 33.4    | Sardinian   | ANUAK            |
| [1] | Egyptans     | Egypt           | NAFRICA    | 26.8   | 30.8    | Yoruba      | Sardinian        |
| [1] | Georgians    | Georgia         | CAUCASUS   | 42.3   | 43.3    |             |                  |
| [1] | Hungarians   | Hungary         | NEUROPE    | 47.2   | 19.5    | Karitiana   | Sardinian        |
| [1] | Iranians     | Iran            | MIDDLEEAST | 32.4   | 53.7    | Samaritians | Colombian        |
| [1] | Jordanians   | Jordan          | MIDDLEEAST | 29.6   | 38.2    | Sardinian   | SUDANESE         |



|     |               |             |            |        |      |             |           |
|-----|---------------|-------------|------------|--------|------|-------------|-----------|
| [1] | Legzins       | Russia      | CAUCASUS   | 42.1   | 47.1 | Samaritians | Colombian |
| [1] | Lithuanians   | Lithuania   | NEUROPE    | 55.2   | 23.9 |             |           |
| [1] | Moroccans     | Morocco     | NAFRICA    | 31.8   | -7.1 | Yoruba      | Sardinian |
| [1] | North_Kannadi | India       | CSASIA     | 10.9   | 76.3 |             |           |
| [1] | Paniya        | India       | CSASIA     | 13.710 | 76.1 |             |           |
| [1] | Romanians     | Romania     | NEUROPE    | 46.0   | 25.0 | Karitiana   | Sardinian |
| [1] | Sakilli       | India       | CSASIA     | 11.130 | 78.7 |             |           |
| [1] | Samaritians   | Israel      | MIDDLEEAST | 35.1   | 35.8 |             |           |
| [1] | Saudis        | SaudiArabia | MIDDLEEAST | 23.9   | 45.1 | GuiGana     | Sardinian |
| [1] | Spaniards     | Spain       | SEUROPE    | 40.5   | -3.8 | Karitiana   | Sardinian |
| [1] | Syrians       | Syria       | MIDDLEEAST | 34.8   | 39   | MbutiPygmy  | Sardinian |
| [1] | Turks         | Turkey      | MIDDLEEAST | 39.0   | 35.2 | Karitiana   | Sardinian |
| [1] | Uzbeks        | Uzbekistan  | CAUCASUS   | 41.4   | 64.6 | Oroqen      | Sardinian |
| [1] | Yemenese      | Yemen       | MIDDLEEAST | 15.6   | 48.5 | MbutiPygmy  | Sardinian |

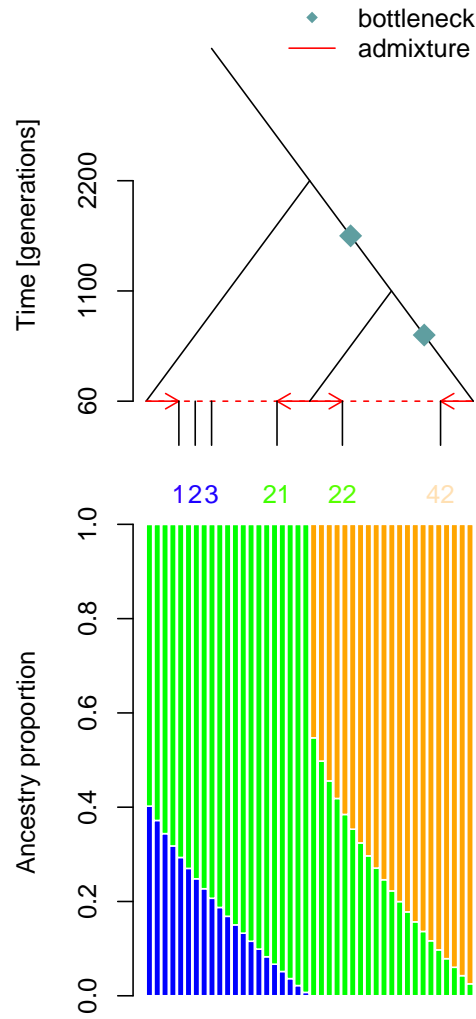

Figure 1. **A more detailed schematic of the model in Figure 1B.** In the top panel we show a schematic representation of the model. All ancestral population sizes are 10,000 individuals, and each bottleneck represents a reduction to a population size of 25 individuals for 10 generations. In the simulations we placed the bottlenecks immediately after the population splits rather than in the middle of the branches. In the lower panel we show the admixture proportions of the 42 sampled populations. Blue, green and orange represent the admixture proportions from the three ancestral populations pictured in the top panel from left to right, respectively.

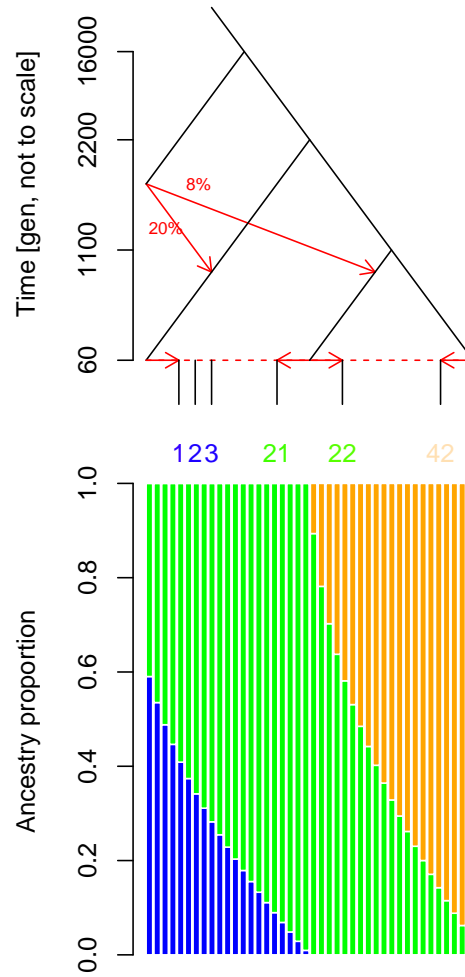

Figure 2. **A more detailed schematic of the model in Figure 1C.** In the top panel we show a schematic representation of the model. All ancestral population sizes are 10,000 individuals. Note that the split time of the archaic population is not to scale. The time of the archaic admixture is 800 generations in the past. In the lower panel we show the admixture proportions of the 42 sampled populations. Blue, green and orange represent the admixture proportions from the three ancestral populations pictured in the top panel from left to right, respectively.

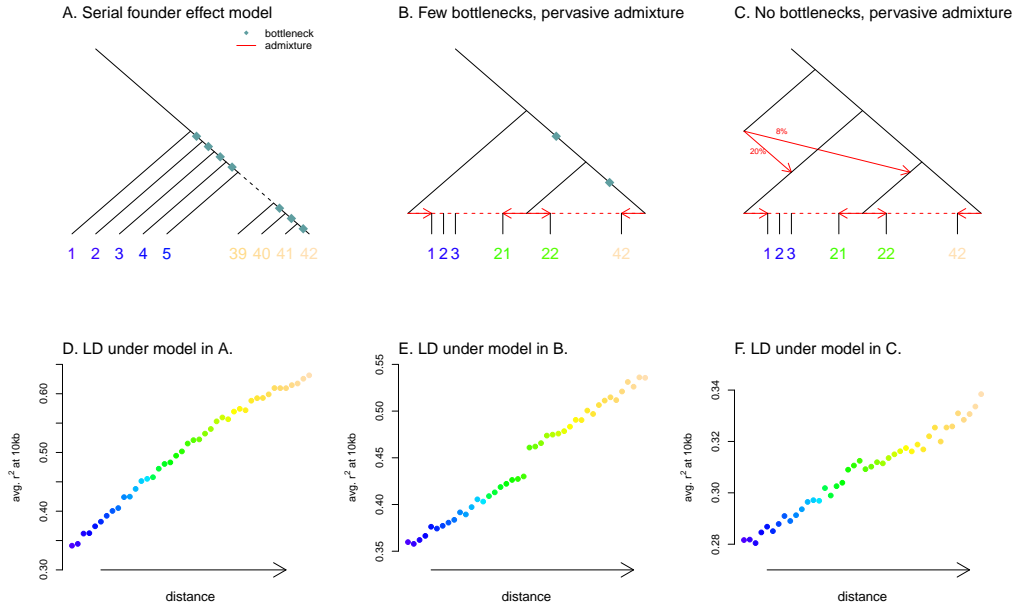

Figure 3. **A positive correlation between LD and geographic distance from a source population can be generated by qualitatively different, historically plausible demographic models.** We simulated genetic data under different demographic models and calculated the average level of LD (measured by  $r^2$  between SNPs separated by 10-11kb) in each simulated population. **A.** Schematic of a serial founder effect model. **B.** Schematic of a demographic model with two bottlenecks and extensive admixture. **C.** Schematic of a demographic model with no bottlenecks and extensive admixture. **D,E,F.** Average LD in each population simulated under the demographic models in A,B, and C respectively. Each point represents a population, ordered along the x-axis according to as in A.

## References

- [1] Behar, D. M., Yunusbayev, B., Metspalu, M., Metspalu, E., Rosset, S., Parik, J., Rootsi, S., Chaubey, G., Kutuev, I., Yudkovsky, G., *et al.*, 2010. The genome-wide structure of the Jewish people. *Nature*, **466**(7303):238–42.
- [2] DeGiorgio, M., Jakobsson, M., and Rosenberg, N. A., 2009. Out of Africa: modern human origins special feature: explaining worldwide patterns of human genetic variation using a coalescent-based serial founder model of migration outward from Africa. *Proc Natl Acad Sci U S A*, **106**(38):16057–62.
- [3] Henn, B. M., Gignoux, C. R., Jobin, M., Granka, J. M., Macpherson, J. M., Kidd, J. M., Rodríguez-Botigué, L., Ramachandran, S., Hon, L., Brisbin, A., *et al.*, 2011. Hunter-gatherer genomic diversity suggests a southern African origin for modern humans. *Proc Natl Acad Sci U S A*, **108**(13):5154–62.
- [4] International HapMap 3 Consortium, Altshuler, D. M., Gibbs, R. A., Peltonen, L., Altshuler, D. M., Gibbs, R. A., Peltonen, L., Dermitzakis, E., Schaffner, S. F., Yu, F., *et al.*, 2010. Integrating common and rare genetic variation in diverse human populations. *Nature*, **467**(7311):52–8.
- [5] Li, J. Z., Absher, D. M., Tang, H., Southwick, A. M., Casto, A. M., Ramachandran, S., Cann, H. M., Barsh, G. S., Feldman, M., Cavalli-Sforza, L. L., *et al.*, 2008. Worldwide human relationships inferred from genome-wide patterns of variation. *Science*, **319**(5866):1100–1104.
- [6] Pagani, L., Kivisild, T., Tarekegn, A., Ekong, R., Plaster, C., Gallego Romero, I., Ayub, Q., Mehdi, S. Q., Thomas, M. G., Luiselli, D., *et al.*, 2012. Ethiopian genetic diversity reveals linguistic stratification and complex influences on the Ethiopian gene pool. *Am J Hum Genet*, **91**(1):83–96.
- [7] Schlebusch, C. M., Skoglund, P., Sjödin, P., Gattepaille, L. M., Hernandez, D., Jay, F., Li, S., De Jongh, M., Singleton, A., Blum, M. G. B., *et al.*, 2012. Genomic variation in seven Khoe-San groups reveals adaptation and complex African history. *Science*, **338**(6105):374–9.

# Trends in Genetics

Pickrell and Reich review recent progress in understanding human migration and admixture, arguing that present-day inhabitants of many geographic locations no longer resemble the original populations that settled these areas, which has implications for assessing human ancestry. Shown here are some of the human migration patterns from the past 20,000 years. Future studies relying on ancient DNA will continue to refine our understanding of human history.

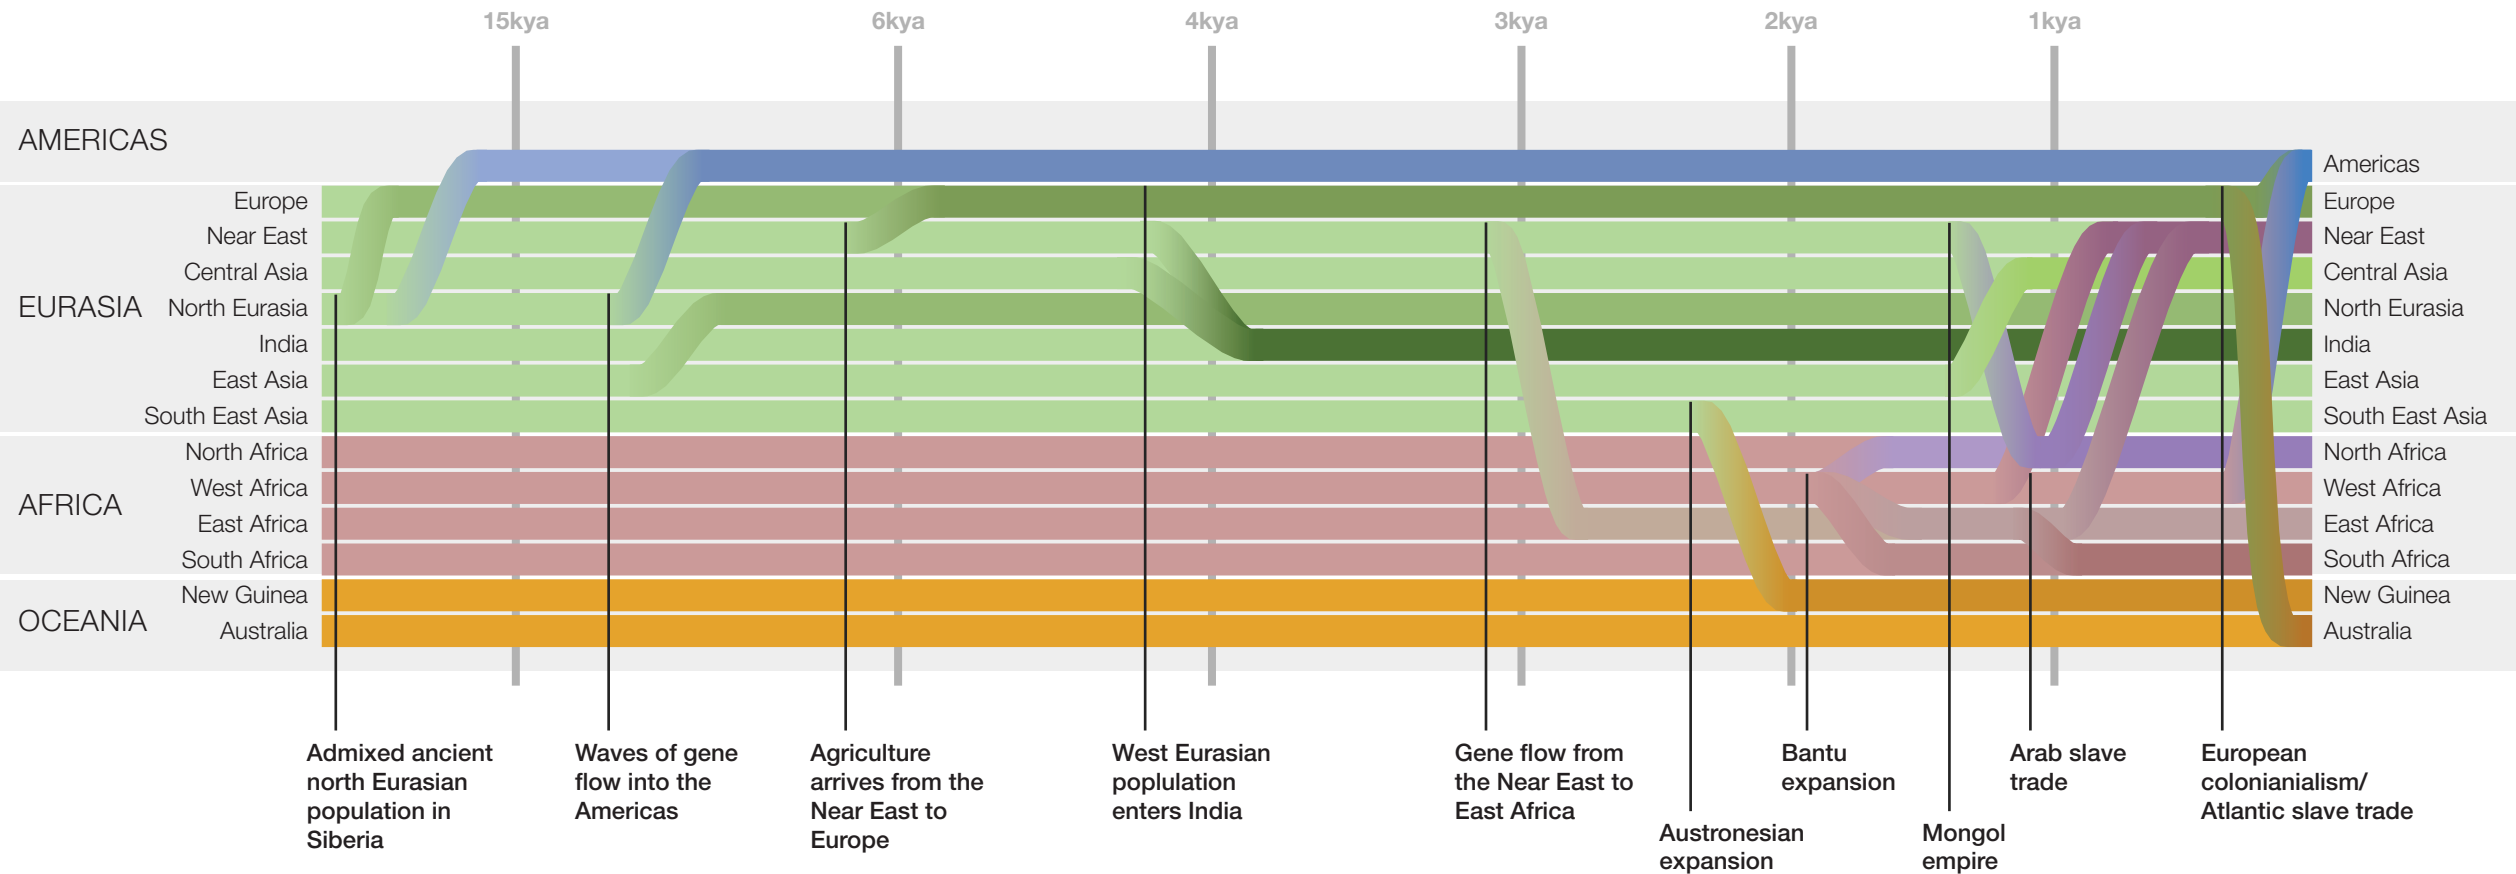

Supplement: NIHMS626145-supplement.pdf [file NIHMS626145-supplement.pdf]
